# Supplementary material for: Controlled synthesis of spin glass nickel oxide nanoparticles and evaluation of their potential antimicrobial activity: A cost effective and eco friendly approach
Source: Royal Society of Chemistry journal article supplement (doi:10.1039/c3ra42628a), 2013-01-01
Supplement: c3ra42628a.pdf [file c3ra42628a.pdf]

# Controlled Synthesis of Spin Glass Nickel Oxide Nanoparticles and Evaluation of their Potential Antimicrobial Activity:

## A Cost-Effective and Eco-Friendly Approach

*Soumyadipta Rakshit<sup>a</sup>, Srabanti Ghosh<sup>b</sup>, Sayantani Chall<sup>a</sup>, Soumya Sundar*

*Mati<sup>a</sup>, S.P.Moulik<sup>ac</sup>, Subhash Chandra Bhattacharya\*<sup>ac</sup>*

<sup>a</sup> Department of Chemistry, Jadavpur University, Kolkata -700032, India

<sup>b</sup> Centre for Advanced Materials, Indian Association for the Cultivation of Science,  
Jadavpur, Kolkata-700032, India

<sup>c</sup> Centre for Surface Science, Department of Chemistry, Jadavpur University,  
Kolkata -700032, India

\*E-mail : [sbjuchem@yahoo.com](mailto:sbjuchem@yahoo.com) / [scbhattacharyya@chemistry.jdvu.ac.in](mailto:scbhattacharyya@chemistry.jdvu.ac.in)

\*Phone No: 033 2414 6223; \*Fax: 91(033) 24146584

## Supporting Information

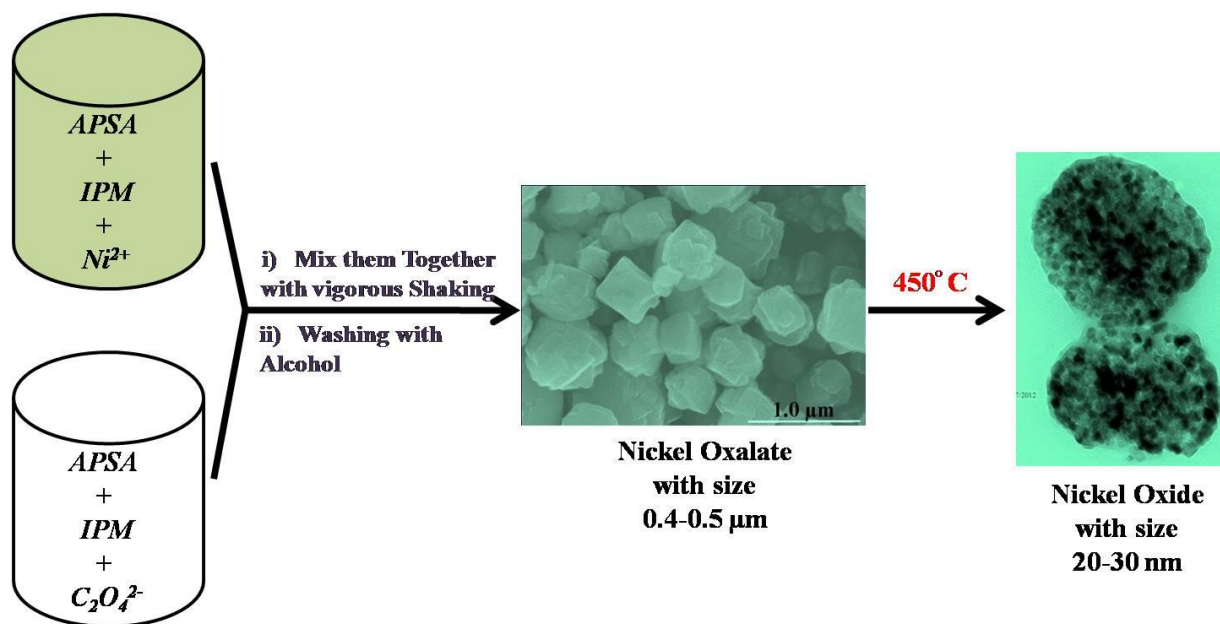

**Fig S1** : Scheme of Synthesis of NiO Nanoparticles

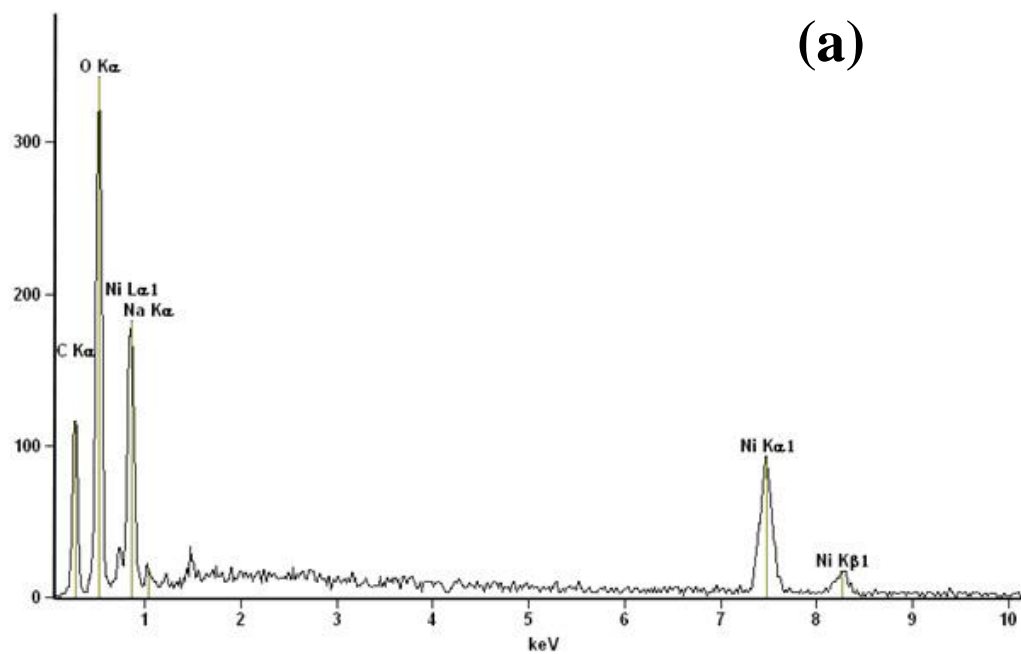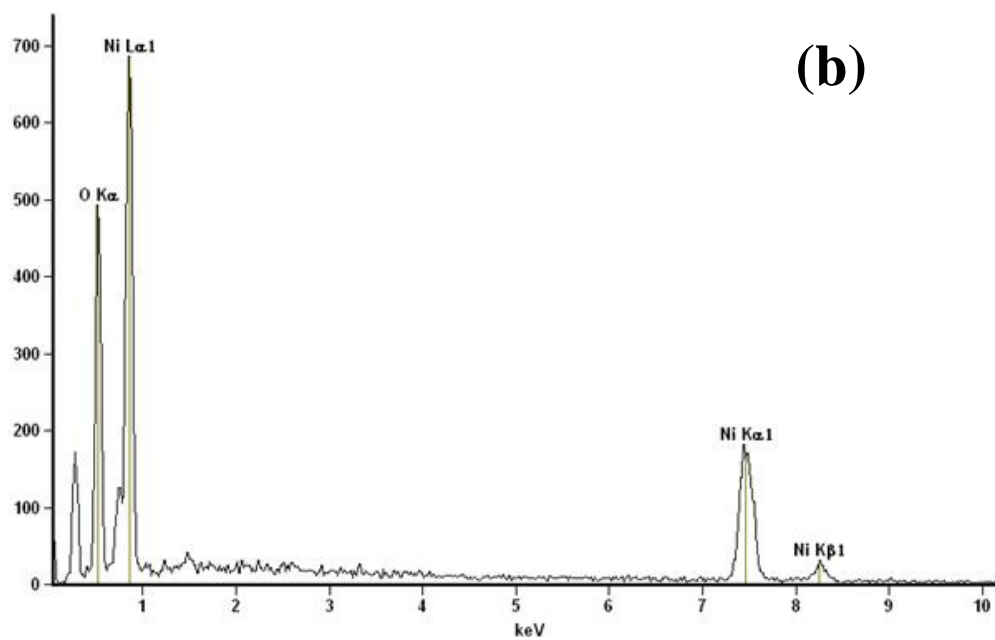

**Figure S2:** Energy dispersive X-ray spectrum of (a) Nickel Oxalate and (b) Nickel Oxide Nanoparticles

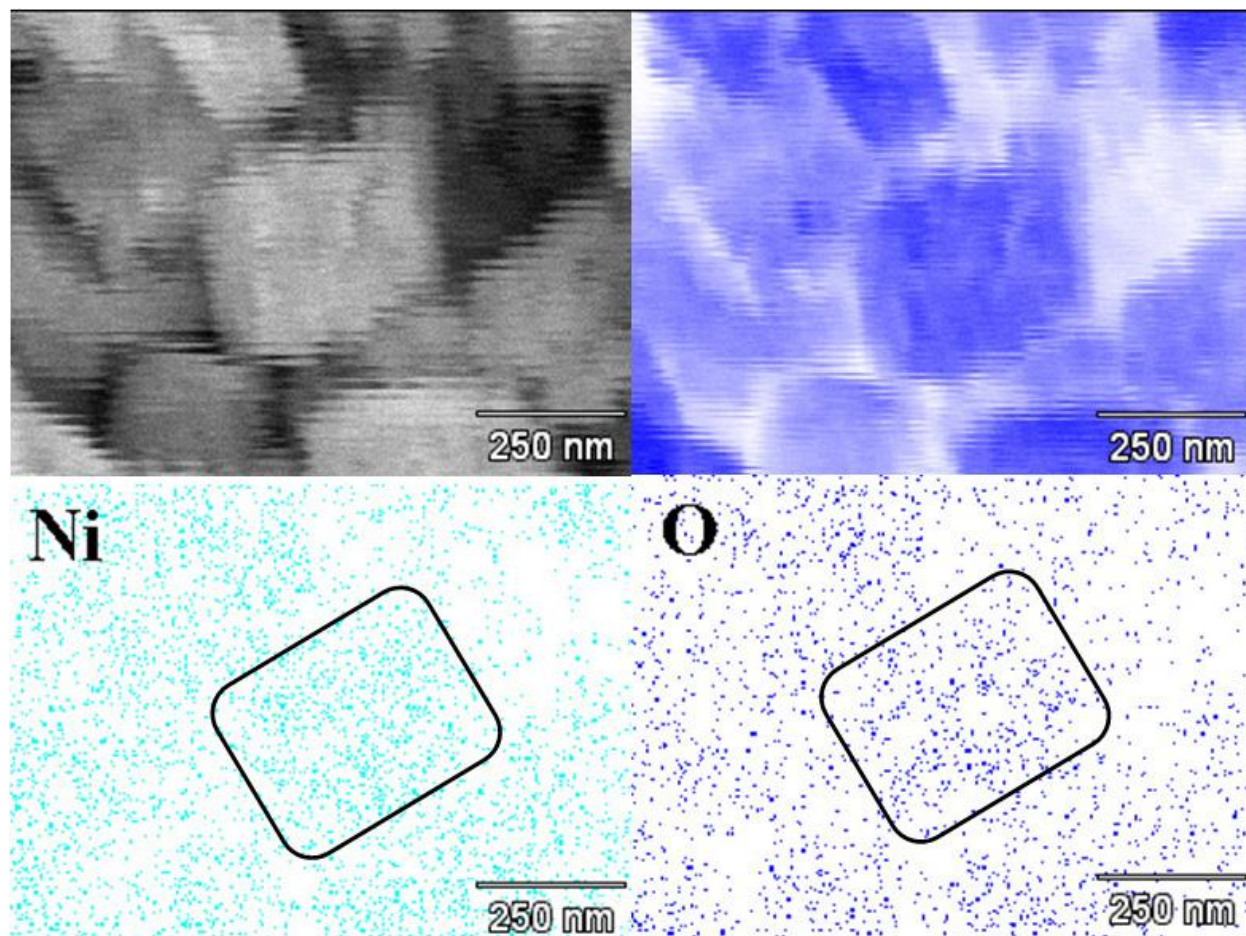

**Figure S3:** Elemental Mapping of Ni and O in NiO

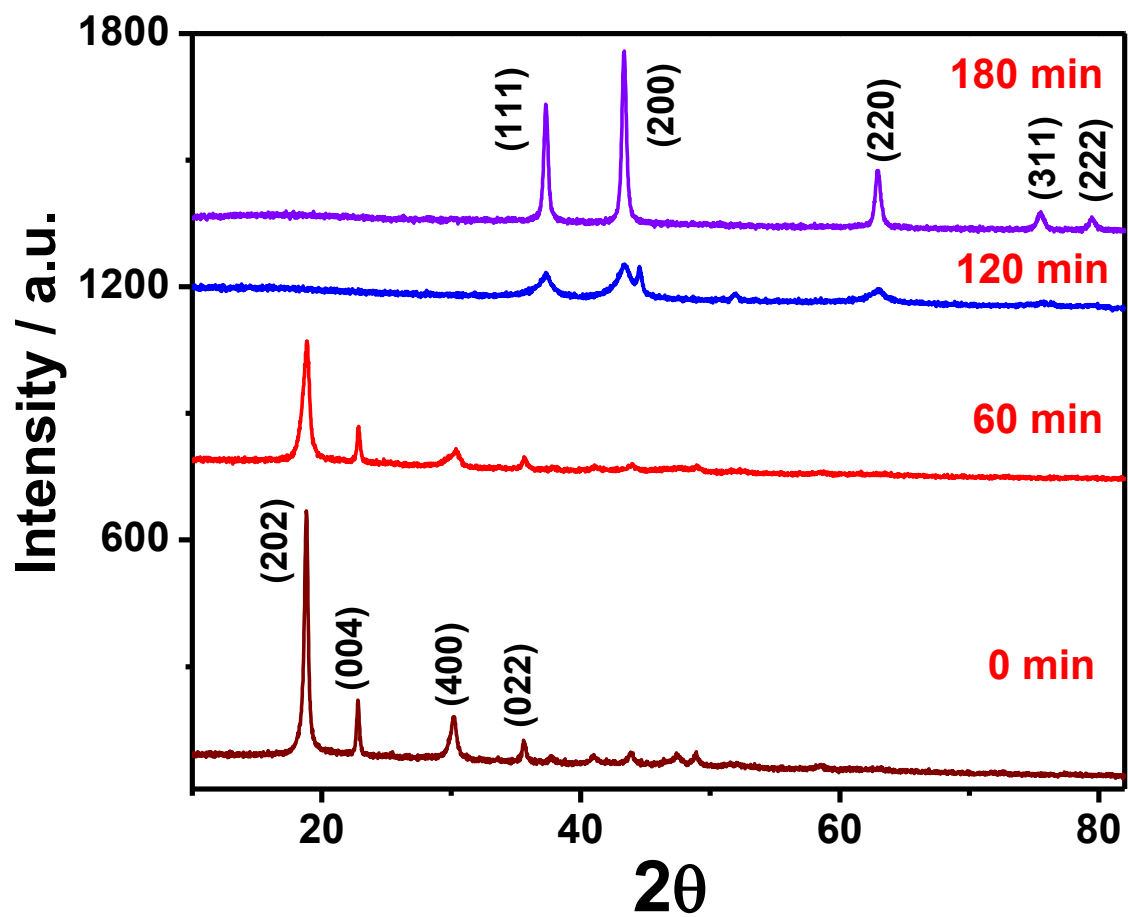

**Figure S4:** XRD patterns of Nickel oxalate and the products after calcining it for 60, 120 and 180 minutes

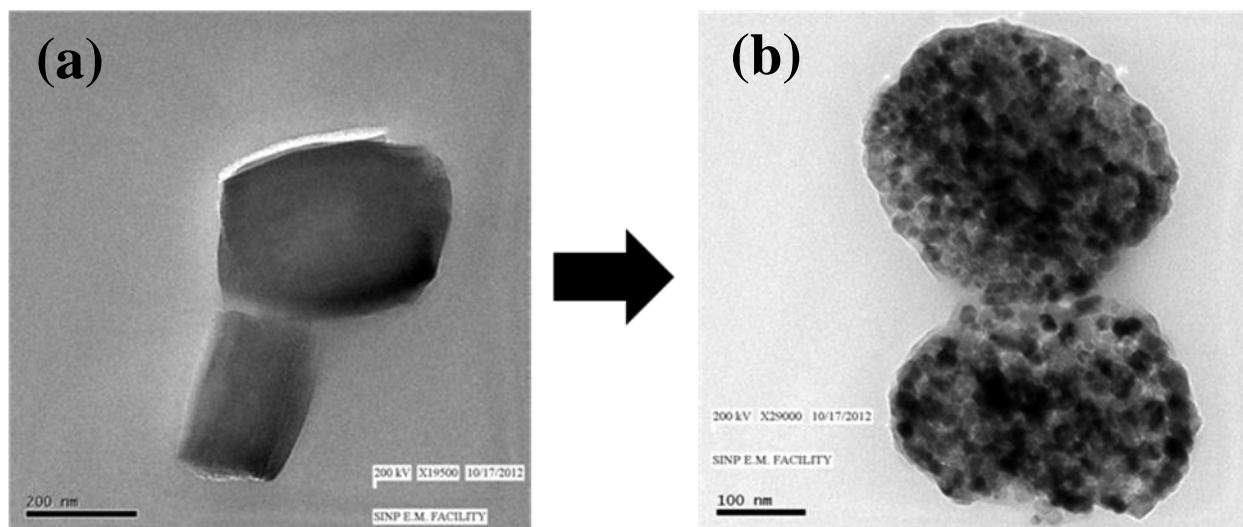

**Figure S5:** (a) Nickel Oxalate parallelograms and (b) showing distribution of NiO NPs within the parallelogram which is a clear indication of retaining the same structure even after calcinations.

| Bacteria             | Nanoparticles | Size (nm) | Reported MIC & MBC ( $\mu\text{g/ml}$ ) | Zone of Inhibition (mm) | Reference |
|----------------------|---------------|-----------|-----------------------------------------|-------------------------|-----------|
| <i>B. subtilis</i>   | Ag            | 2-10      | MIC-40<br>MBC-60                        | NM                      | 1         |
|                      | Cu            | 7-16      | MIC-20<br>MBC-40                        | NM                      | 1         |
|                      | CuO           | 27        | MIC-70<br>MBC-95                        | 15                      | 2         |
|                      | ZnO           | 20        | MBC-12                                  | NM                      | 3         |
|                      | NiO           | 20-30     | MIC-8<br>MBC-32                         | 21                      | This Work |
| <i>P. aeruginosa</i> | Ag            | 20        | MIC-3.5<br>MBC-3.5                      | 13.5                    | 4         |
|                      | CuO           | 27        | MIC-55<br>MBC-85                        | 10                      | 2         |
|                      | ZnO           | 20        | MBC-14                                  | NM                      | 3         |
|                      | NiO           | 20-30     | MIC-8<br>MBC-16                         | 18                      | This Work |

Abbreviations: NM- Not mentioned

**Table ST1** : Summary of select studies concerning the antimicrobial effects of other metal and metal oxide nanoparticles

- 1) J. P. Ruparelia, A. K. Chatterjee, S. P. Duttagupta, S. Mukherji, *Acta Biomaterialia*, 2008, **4**, 707
- 2) A. Azam, A. S Ahmed, M. Oves, M.S. Khan, A. Memic, *International Journal of Nanomedicine*, 2012, **7**, 3527

- 3) A. Azam, A. S. Ahmed, M. Oves, M. S. Khan, S. S. Habib and Adnan Memic,  
International Journal of Nanomedicine, 2012, 7, 6003
- 4) Jamileh Nowroozi, Abbas Akhavan Sepahi, and Afrooz Rashnonejad, Cell J. 2012  
Spring, **14(1)**, 7–18.
